# Supplementary material for: Assessing Cognitive Skills in Early Childhood Education Using a Bilingual Early Language Learner Assessment Tool
Source: MDPI journal article supplement (doi:10.3390/jintelligence11070143), 2023-07-17
Supplement: s1 [file s1]

Table S1.

*A comparative summary of the academic and cognitive skill domains of commonly used KEAs*

|                                            |                | BELLA                                                    | TS-GOLD                                                                                                                    | Brigance                          | STAR-EL                                           |
|--------------------------------------------|----------------|----------------------------------------------------------|----------------------------------------------------------------------------------------------------------------------------|-----------------------------------|---------------------------------------------------|
| Administration<br>Delivery<br>Item formats |                | Teacher-led<br>Tablet<br>Various                         | Teacher-led<br>Observation<br>Various                                                                                      | Teacher-led<br>Teacher<br>Various | Independent<br>Computer/Tablet<br>Multiple Choice |
| Academic<br>Domains                        | Early literacy | x                                                        | x                                                                                                                          | x                                 | x                                                 |
|                                            | Early numeracy | x                                                        | x                                                                                                                          | x                                 | x                                                 |
|                                            | Early science  | x                                                        | x                                                                                                                          |                                   |                                                   |
| Cognitive Skill<br>Domains                 |                | Analytical<br>Creative<br>Practical<br>Social- emotional | Social emotional<br>Attention<br>Persistence<br>Problem-solving<br>Curiosity<br>Motivation<br>Flexibility<br>Inventiveness |                                   |                                                   |
| Other<br>Domains                           |                |                                                          | Social studies<br>Arts<br>English Language<br>acquisition<br>Physical development                                          | Physical<br>development           |                                                   |
